# Supplementary material for: The impact of mild episodic ketosis on microglia and hippocampal long‐term depression in 5xFAD mice
Source: PubMed Central journal article supplement — FASEB Bioadv. 2024 Oct 23;6(12):581–96. doi: 10.1096/fba.2024-00123 (PMC11618890; doi:10.1096/fba.2024-00123), 2024-10-23
Supplement: FBA2-6-581-s001.pdf [file FBA2-6-581-s001.pdf]

Supplementary Figure 1

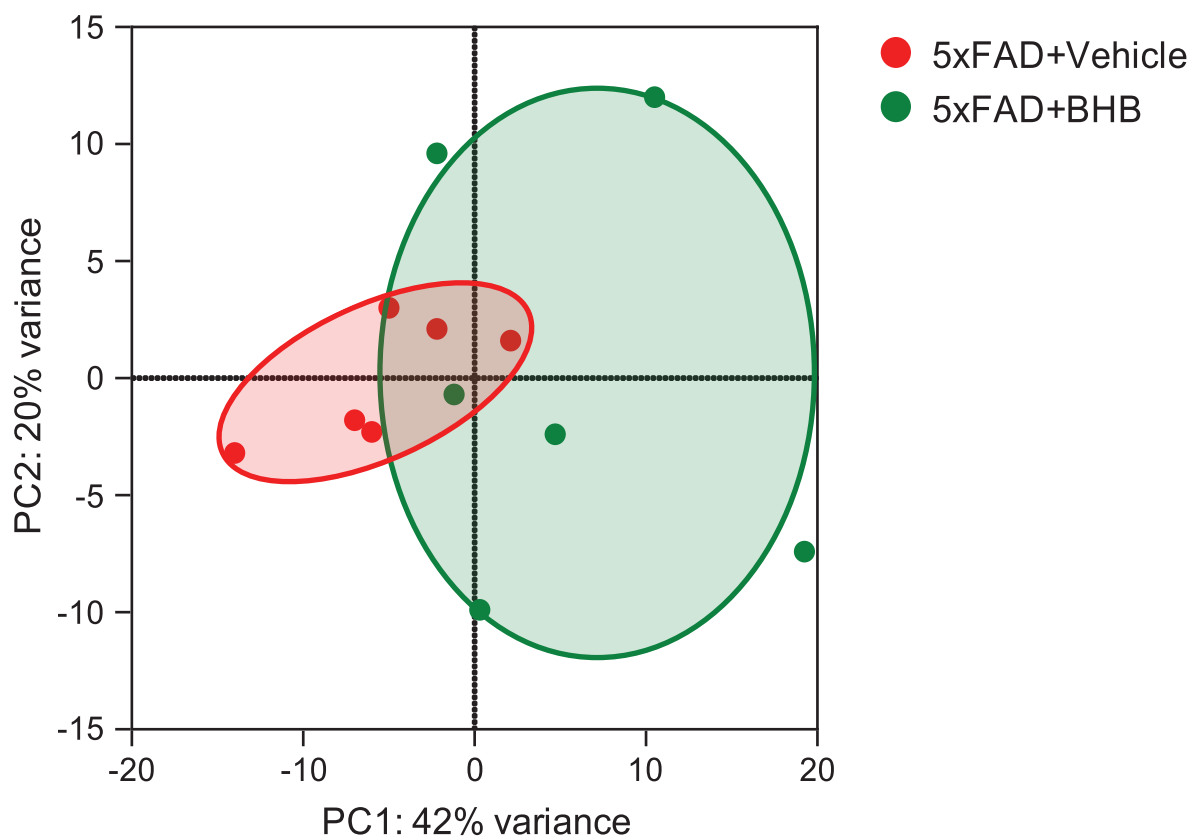

**Supplementary Figure 1.** Plot of principal component analysis (PCA) of gene expression revealed by RNA-seq, showing a clear separation between 5xFAD+vehicle and 5xFAD+BHB groups.

Supplementary Figure 2

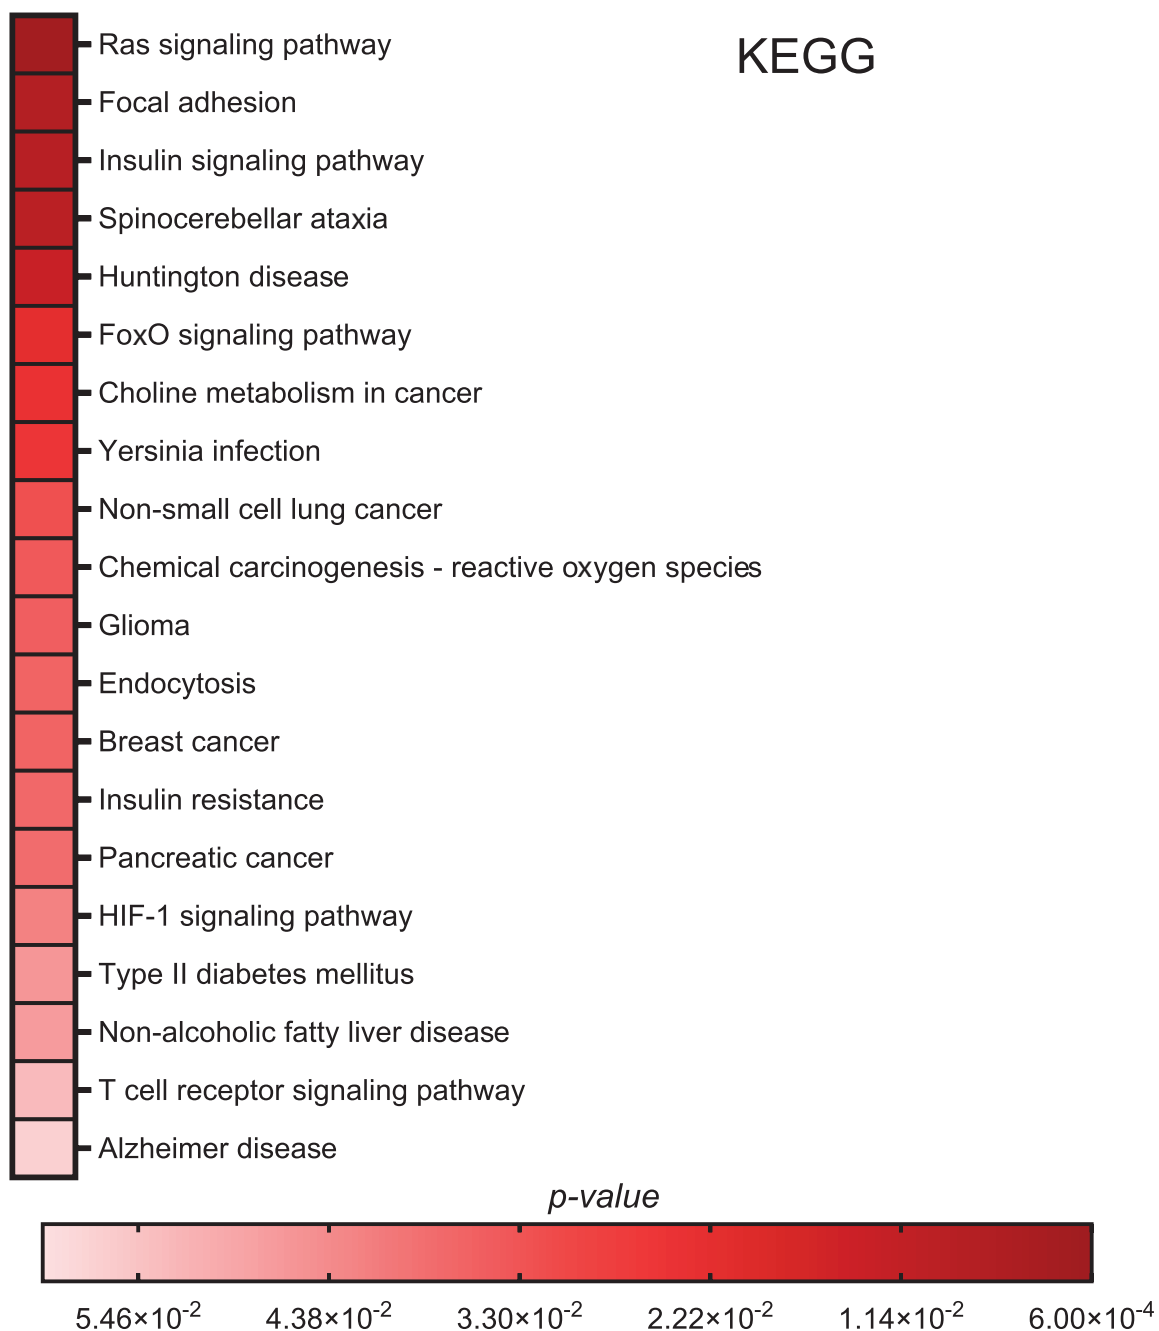

**Supplementary Figure 2.** Top KEGG pathways of DEGs in 5xFAD+BHB compared to 5xFAD+vehicle.

Supplementary Figure 3

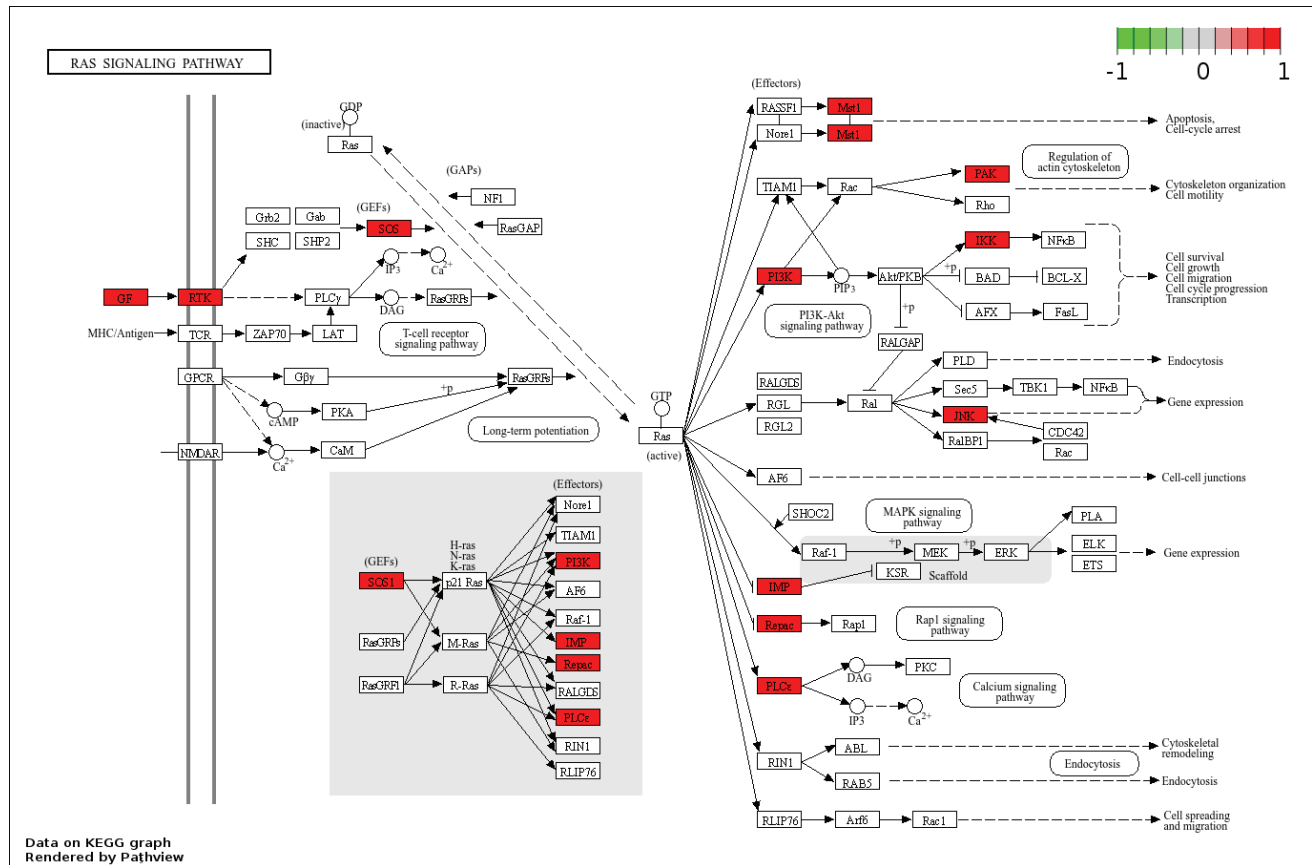

**Supplementary Figure 3.** RAS signaling pathway from KEGG analysis in 5xFAD+BHB compared to 5xFAD+Vehicle. Red highlights represent genes with increased relative expression in 5xFAD+BHB group.

Supplementary Figure 4

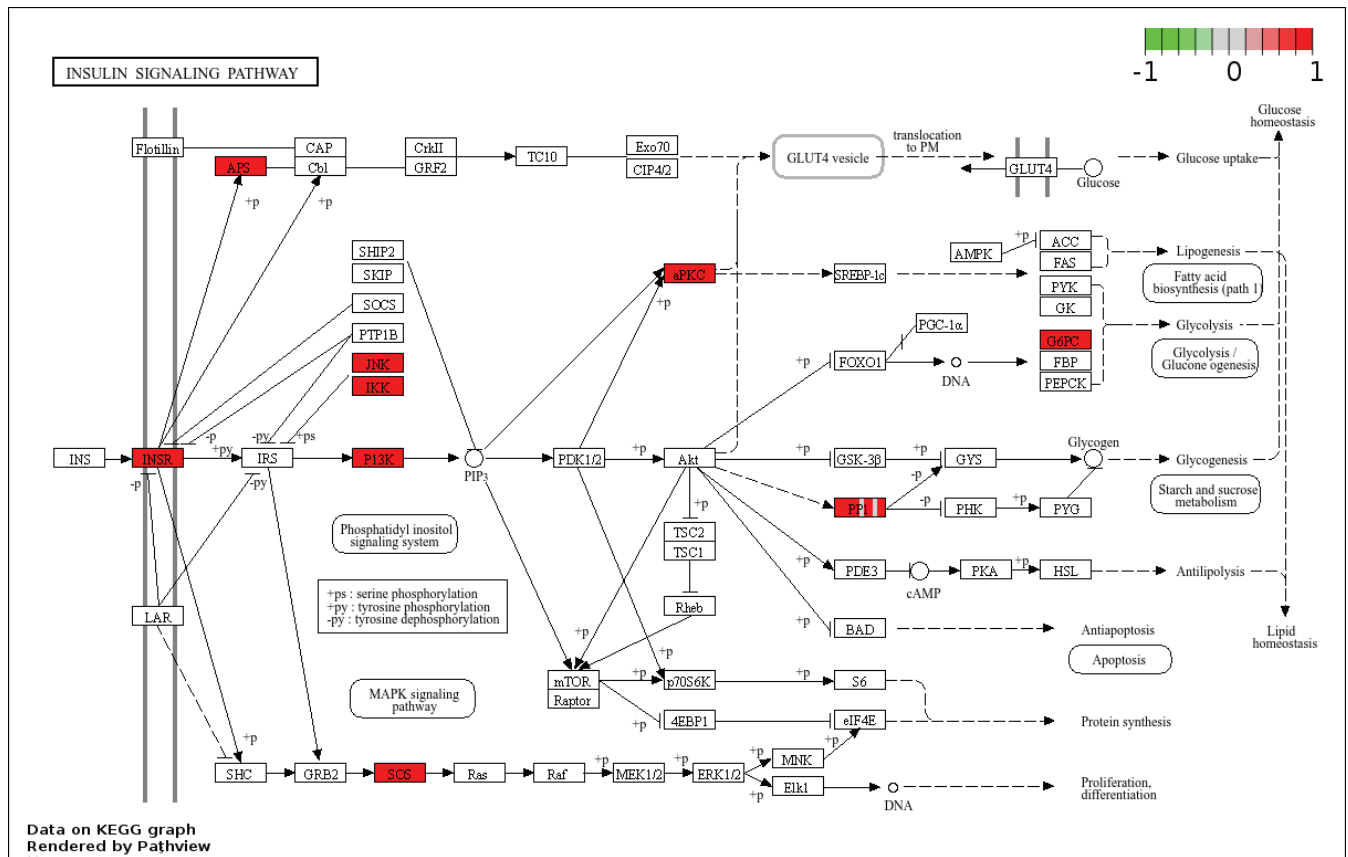

**Supplementary Figure 4.** Insulin signaling pathway from KEGG analysis in 5xFAD+BHB compared to 5xFAD+Vehicle. Red highlights represent genes with increased relative expression in 5xFAD+BHB group.

Supplementary Figure 5

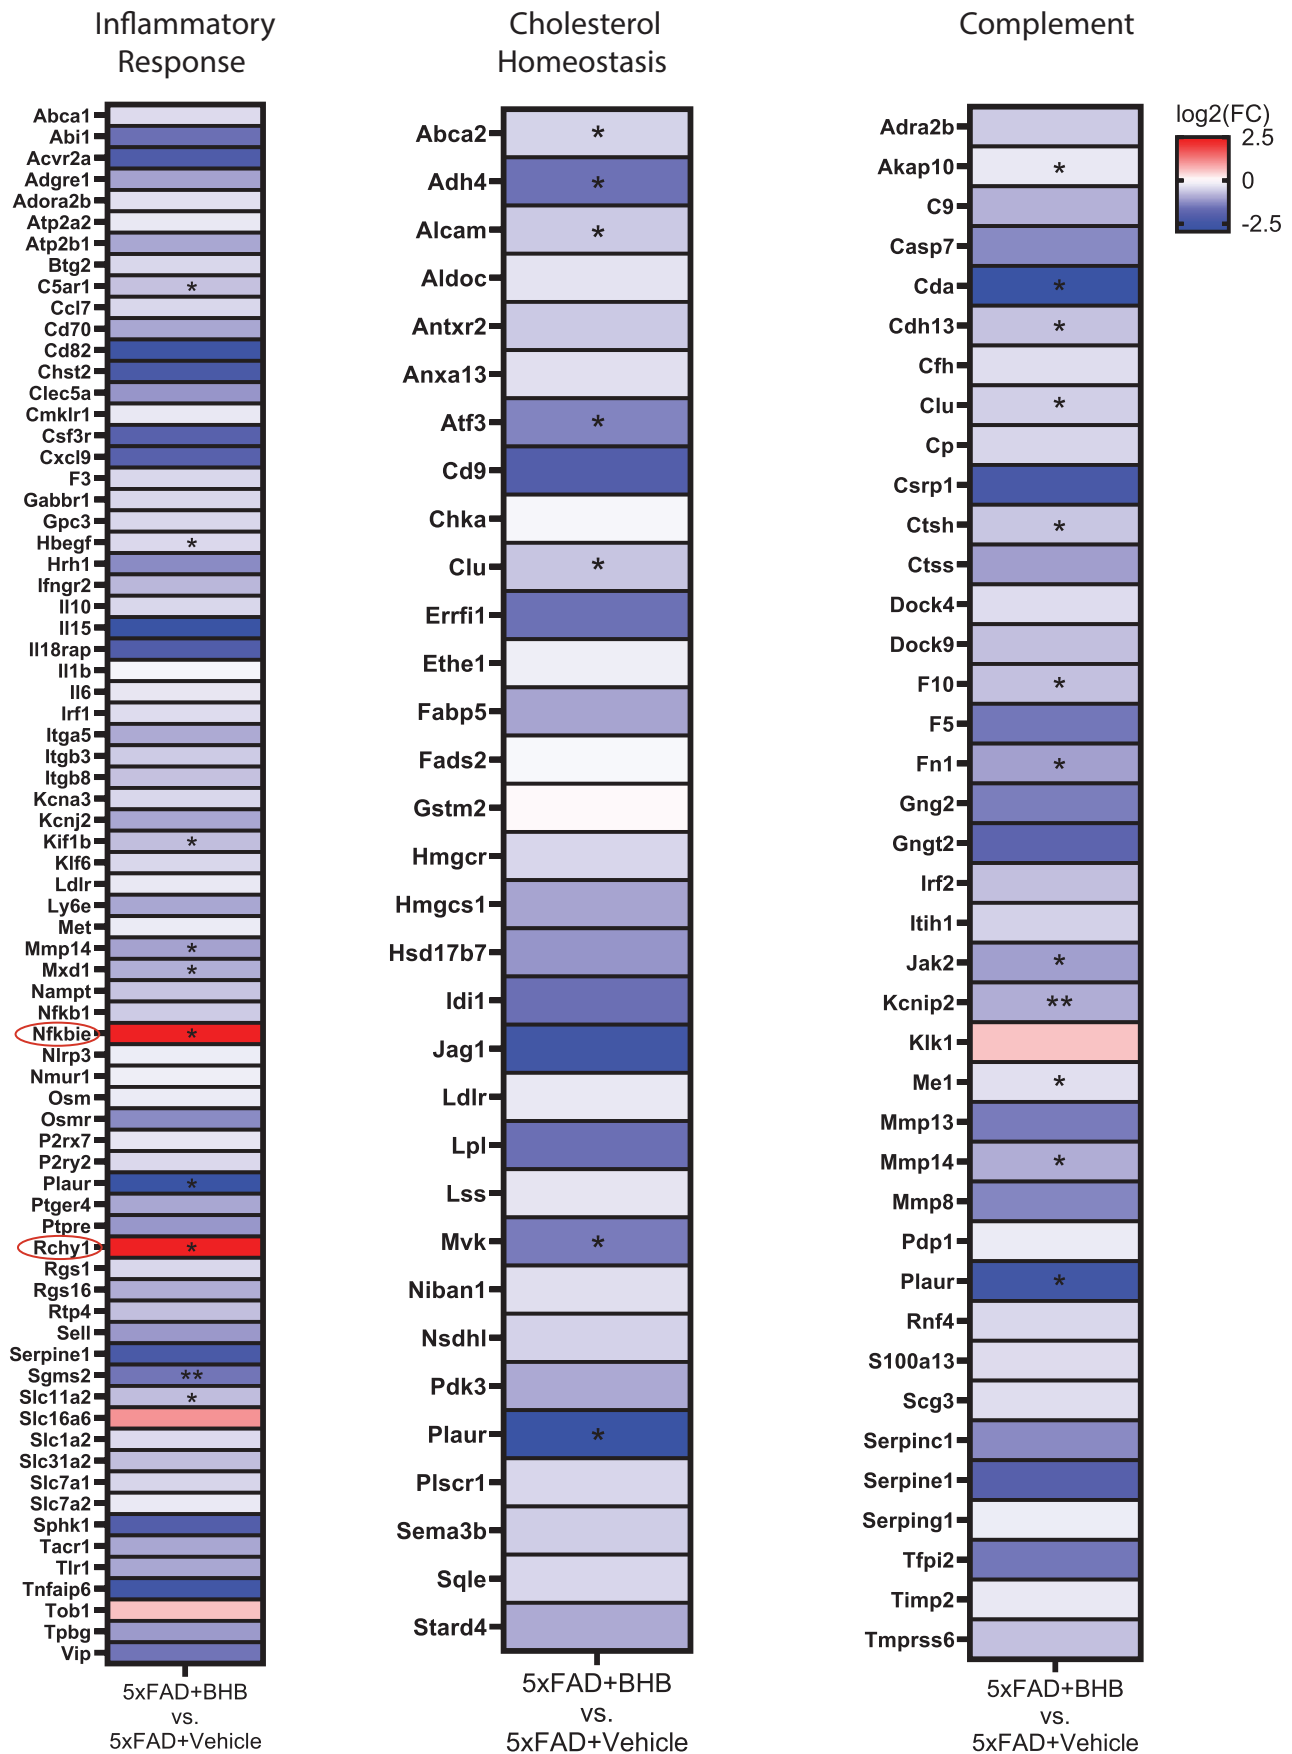

**Supplementary Figure 5.** Heatmap showing the DEGs in the “Inflammatory response”, “Cholesterol homeostasis”, and “Complement” gene sets \* p-value < 0.05 but FDR > 0.05, \*\* p-value < 0.05 and FDR < 0.05.

Supplementary Figure 6

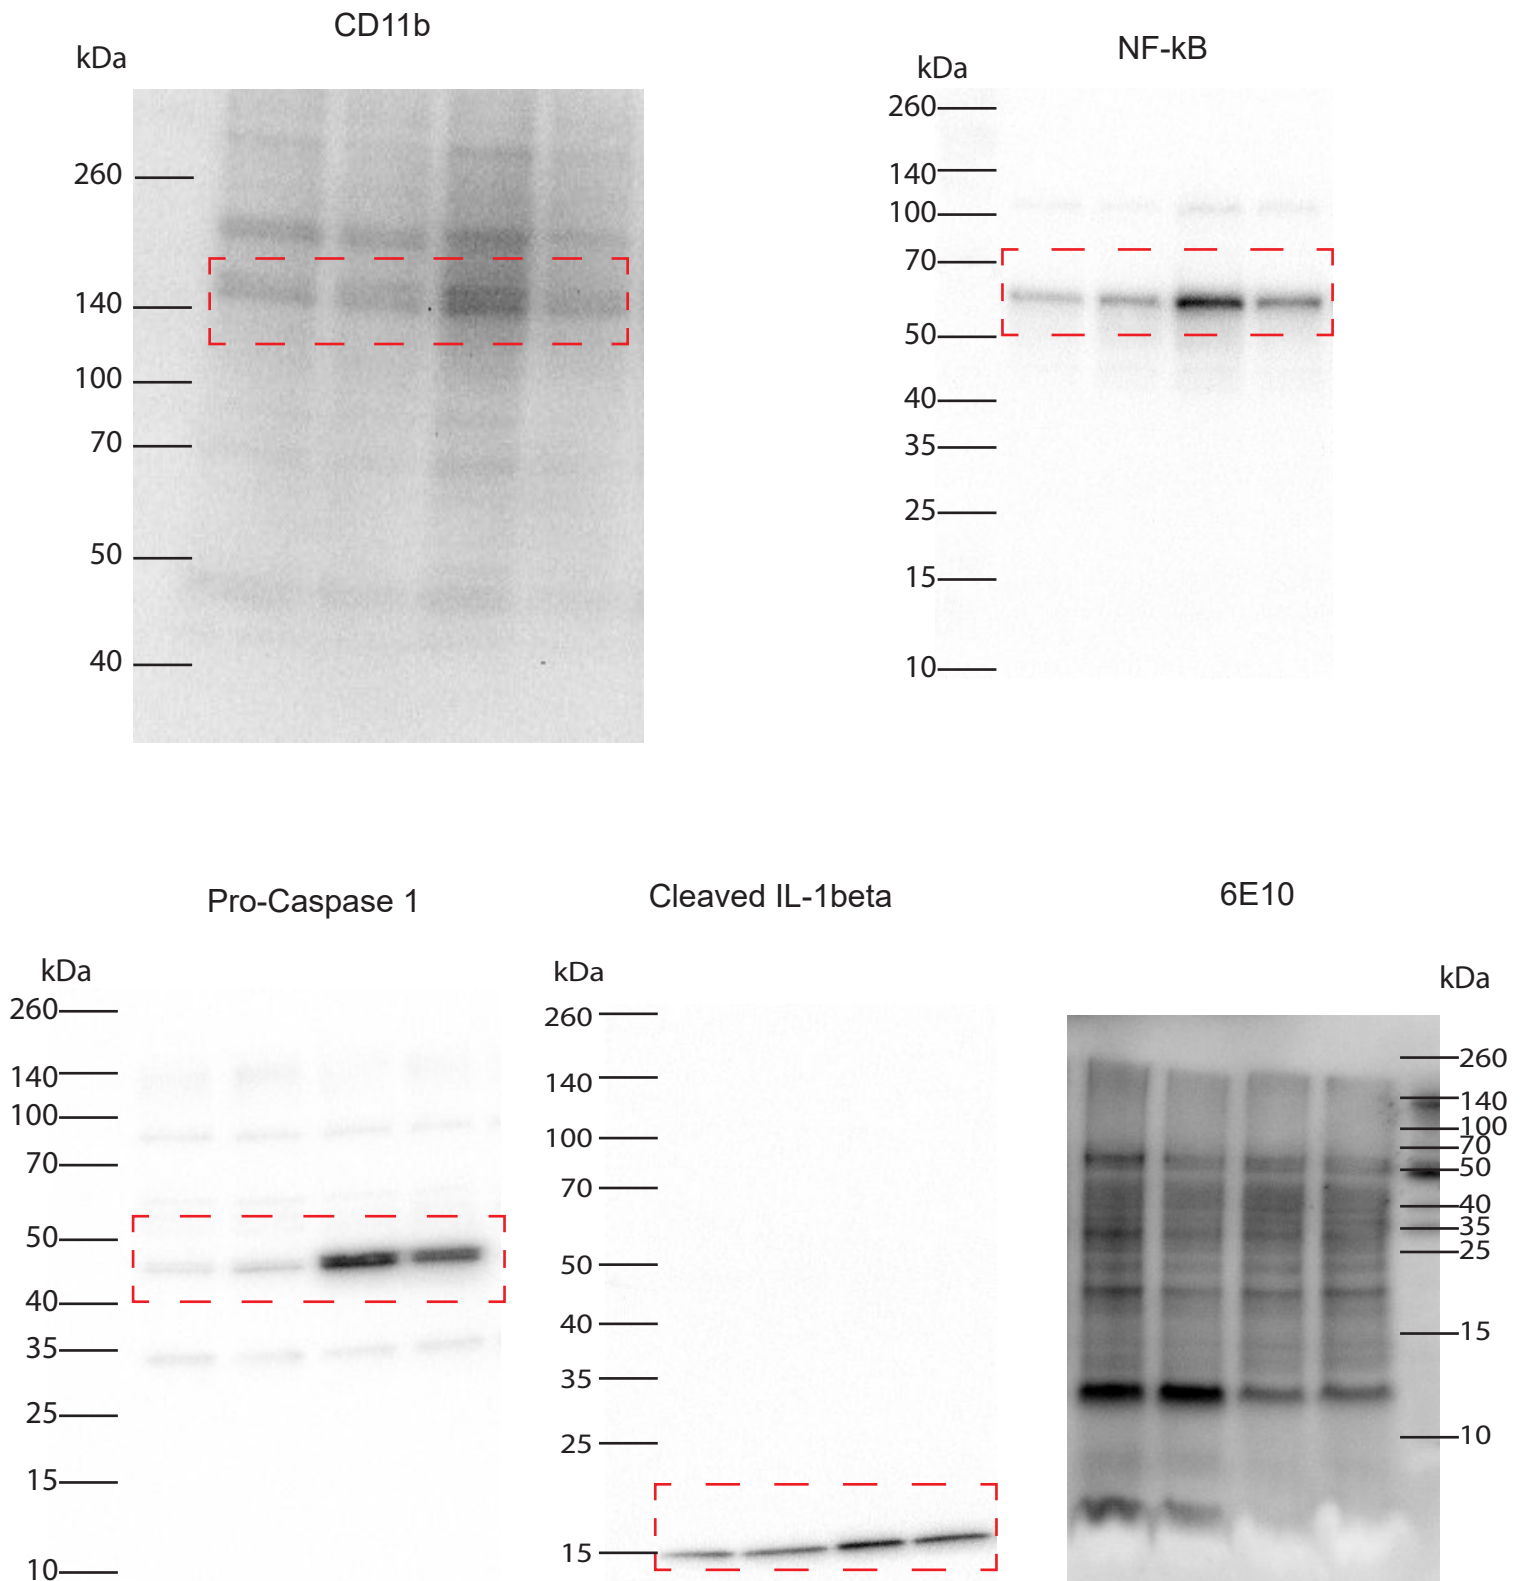

Supplementary Figure 6. Uncropped blot
